# Supplementary material for: Comparison of simulations from a state-of-the-art dynamic global vegetation model (LPJ-GUESS ) driven by low- and high-resolution climate data
Source: Copernicus journal article supplement (doi:10.5194/egusphere-2025-1401), 2025-04-22
Supplement: Supplementary file 1 [file egusphere-2025-1401-supplement.pdf]

1 Supplement of Comparison of Europe-wide simulations

The following plots show climate-response biases in low-resolution model output, calculated as the difference between the low- and high-resolution predictions, averaged over the period 2010–2014. The value from every high-resolution gridcell was subtracted from the value in the corresponding 10 × 10 low-resolution block. Only fully overlapping low- and high-resolution  
5 gridcells are represented. Red indicates a higher value in the low-resolution run than in the high-resolution run.

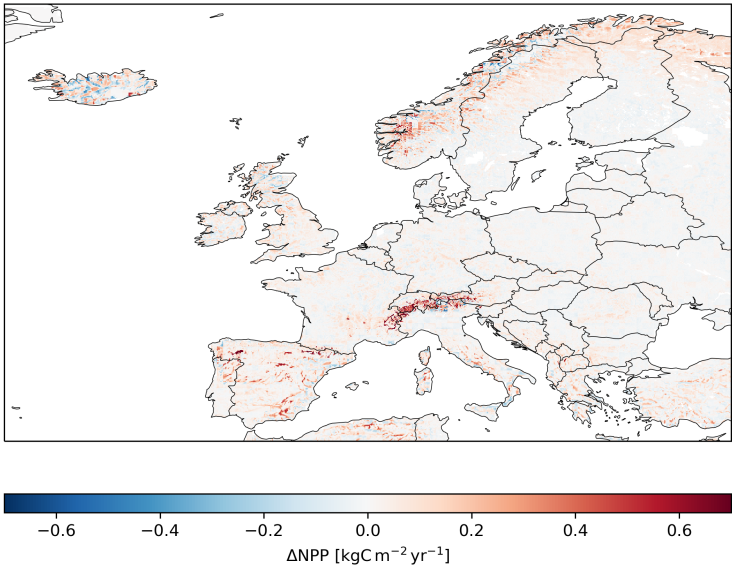

Fig. S1. Net Primary Productivity

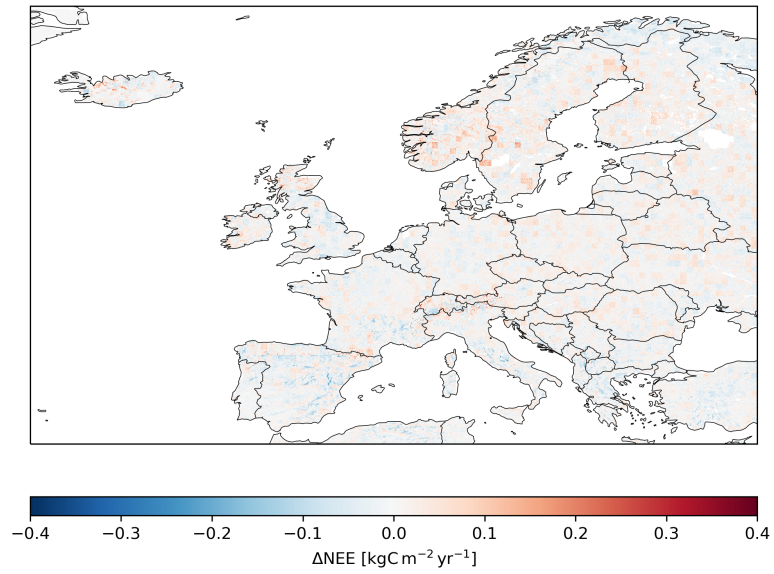

**Fig. S2.** Net ecosystem productivity

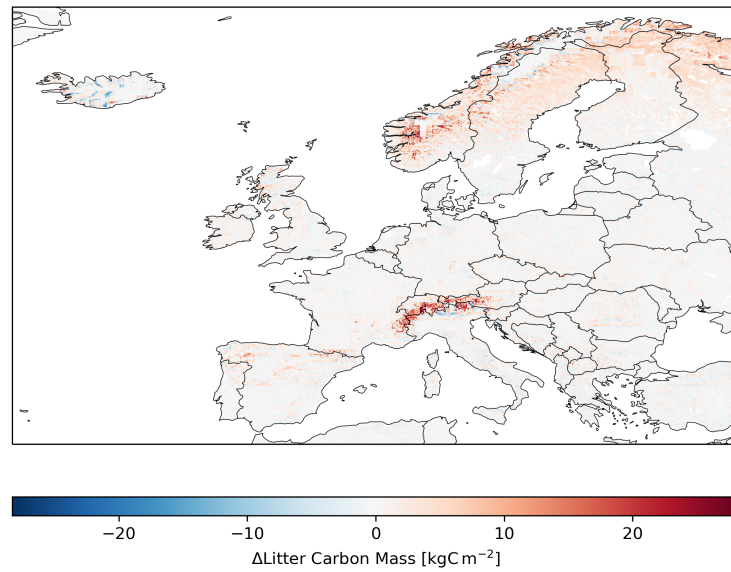

**Fig. S3.** Amount of carbon stored in litter

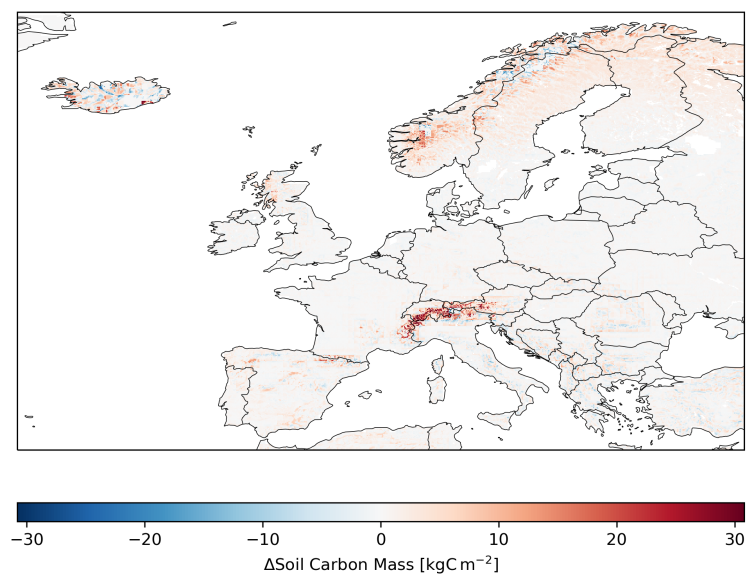

**Fig. S4.** Amount of carbon stored in the soil

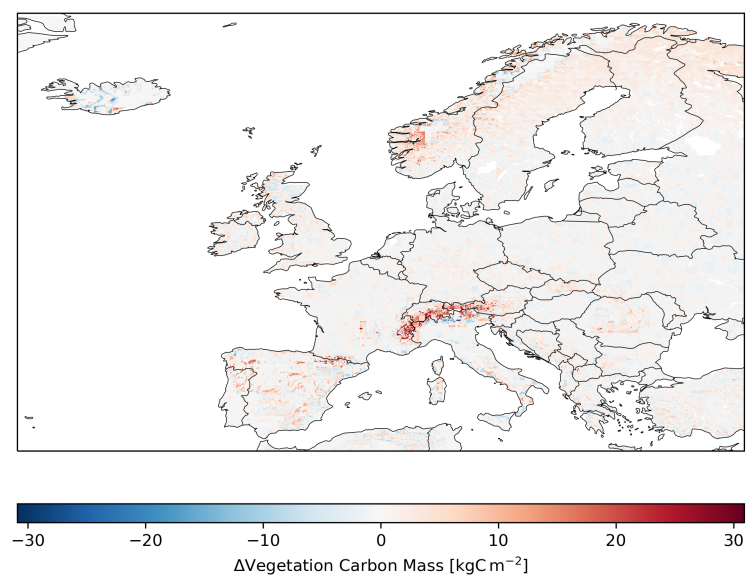

**Fig. S5.** Amount of carbon stored in above-ground vegetation

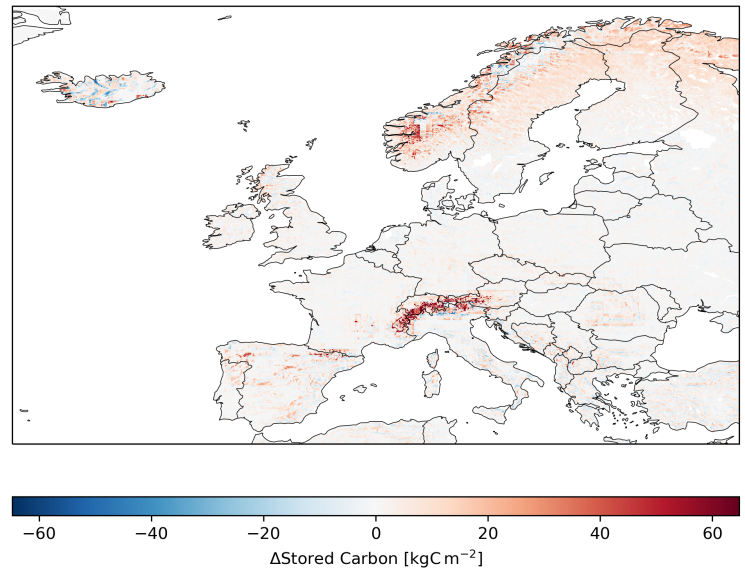

**Fig. S6.** Total amount of stored carbon

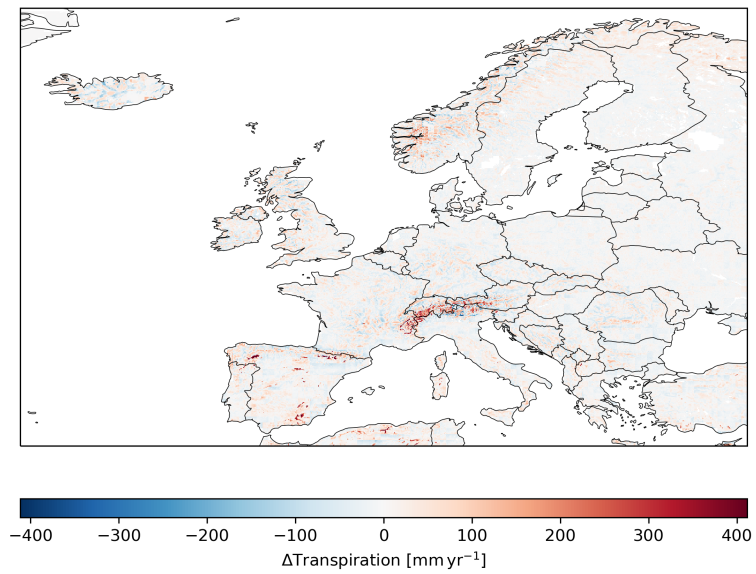

**Fig. S7.** Aggregated ecosystem transpiration

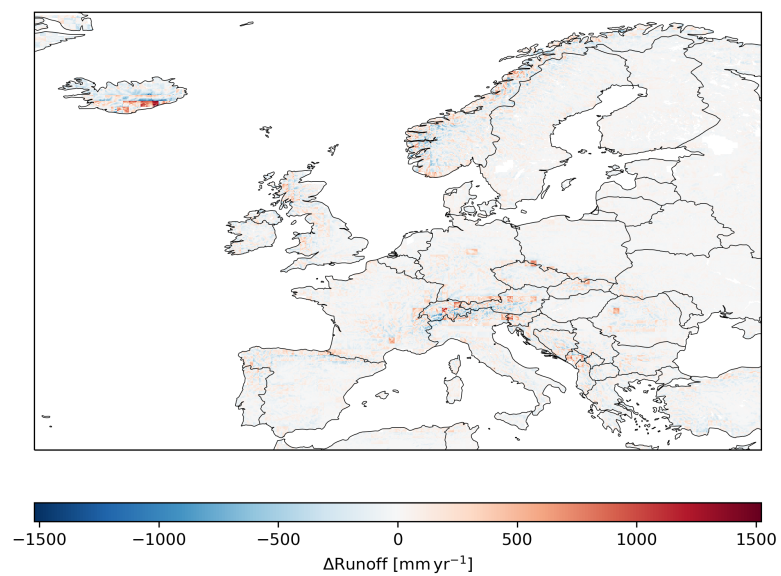

**Fig. S8.** Runoff

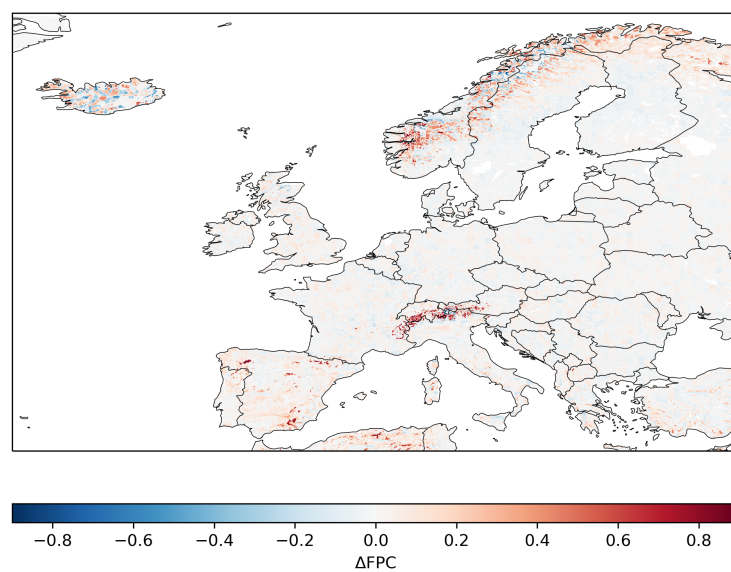

**Fig. S9.** Foliar Projective Cover

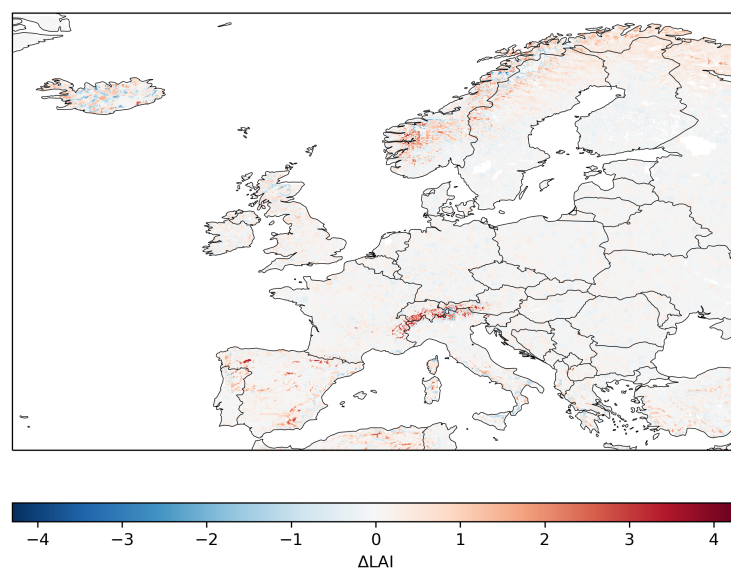

**Fig. S10.** Leaf Area Index
